# Supplementary material
Source: HighWire-hosted journal article supplement (http://molpharm.aspetjournals.org/highwire/filestream/76756/field_highwire_adjunct_files/1/MOL52829_SuppFig2.pdf)

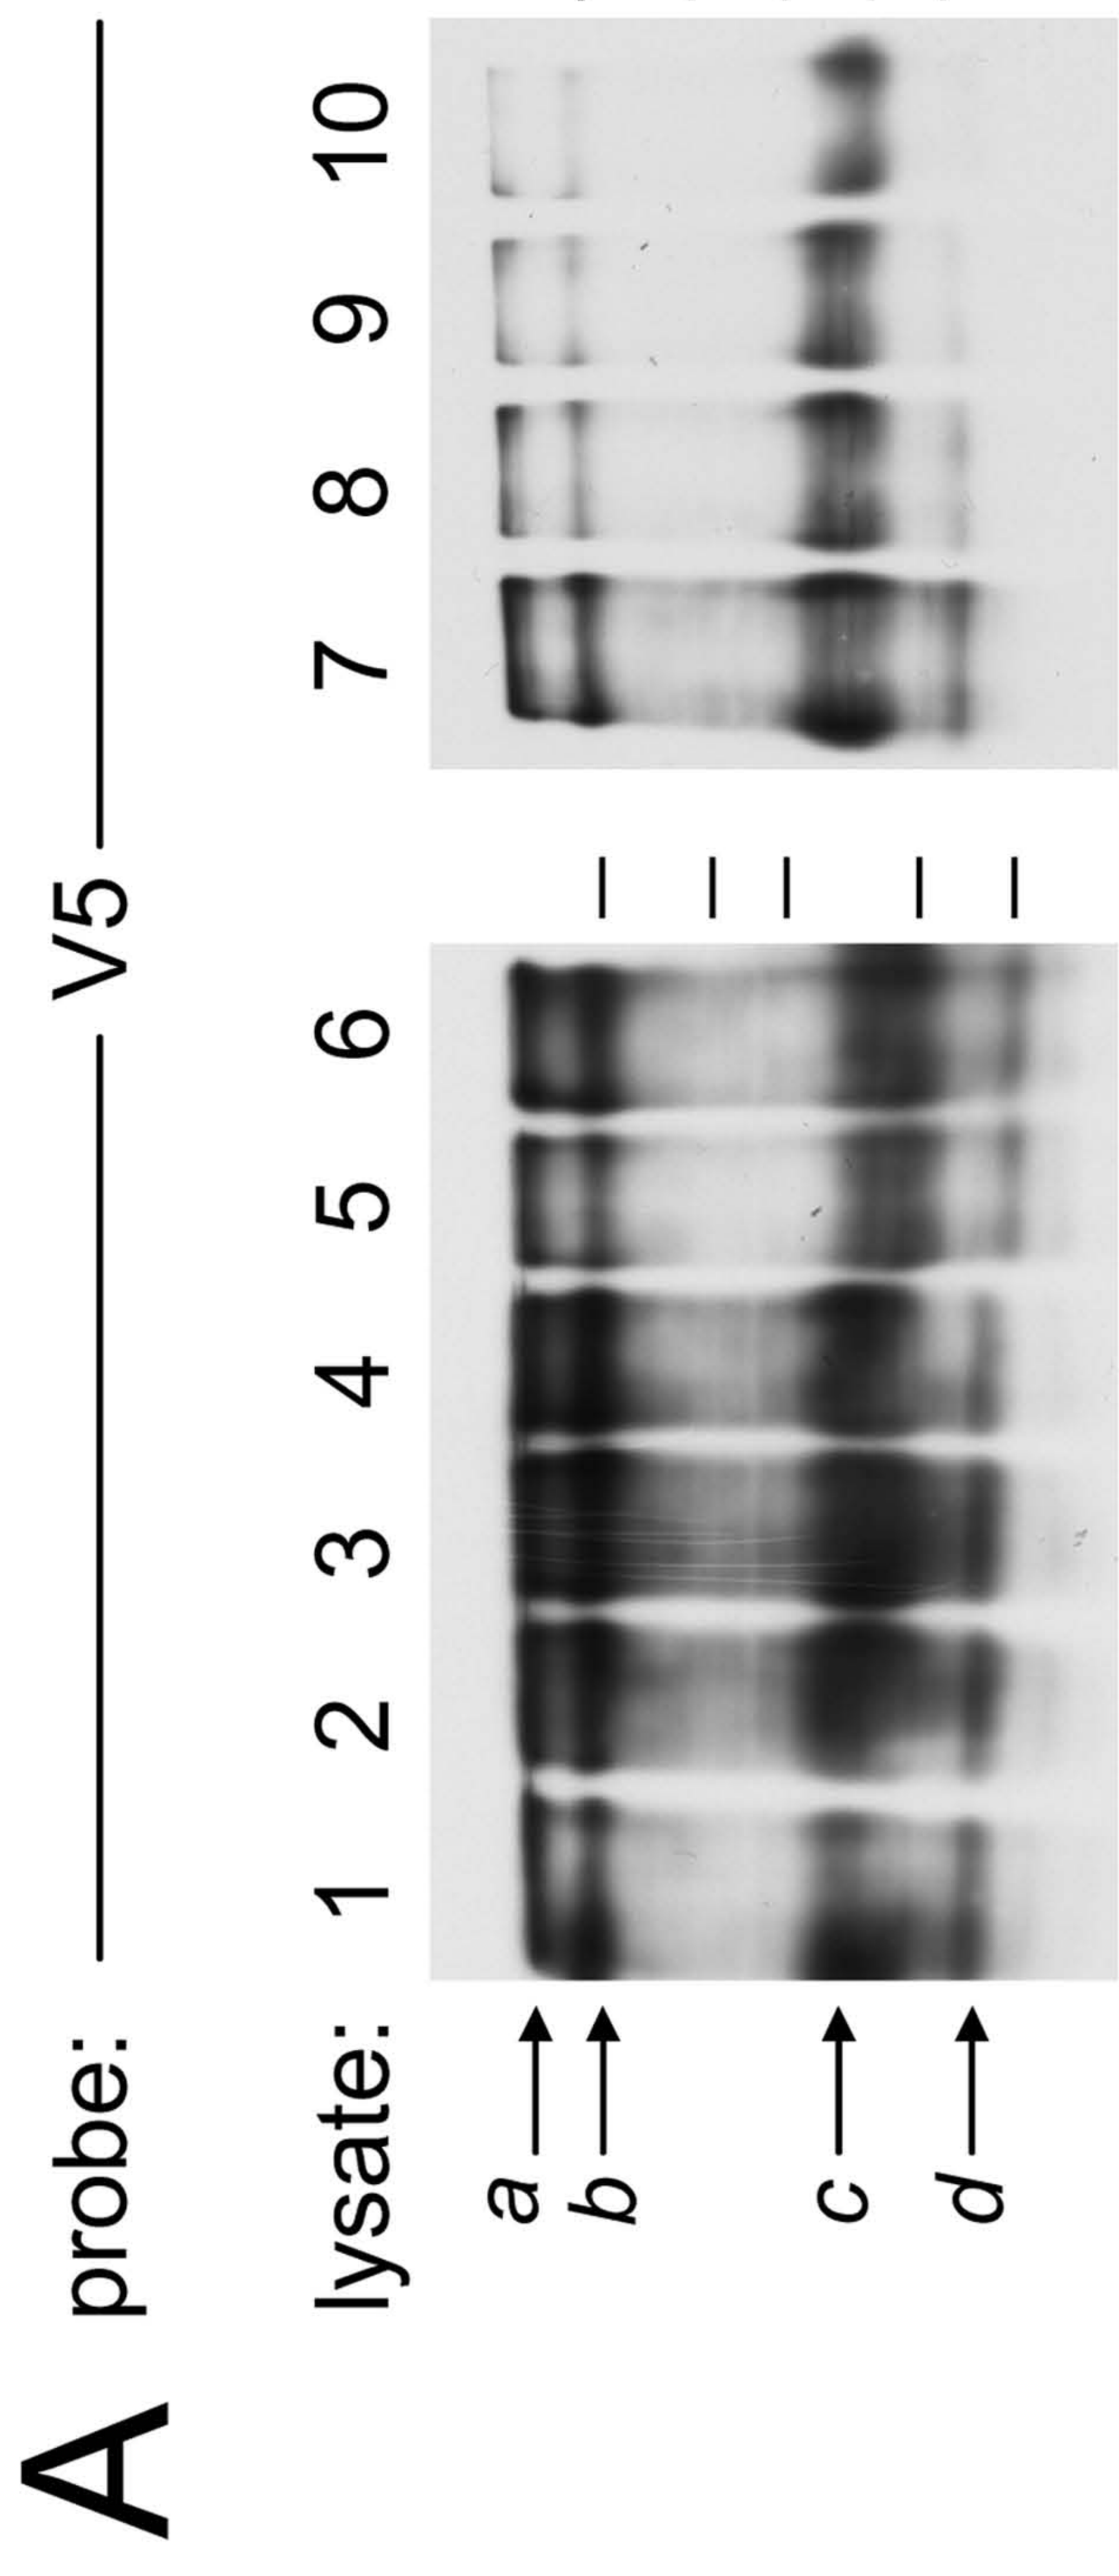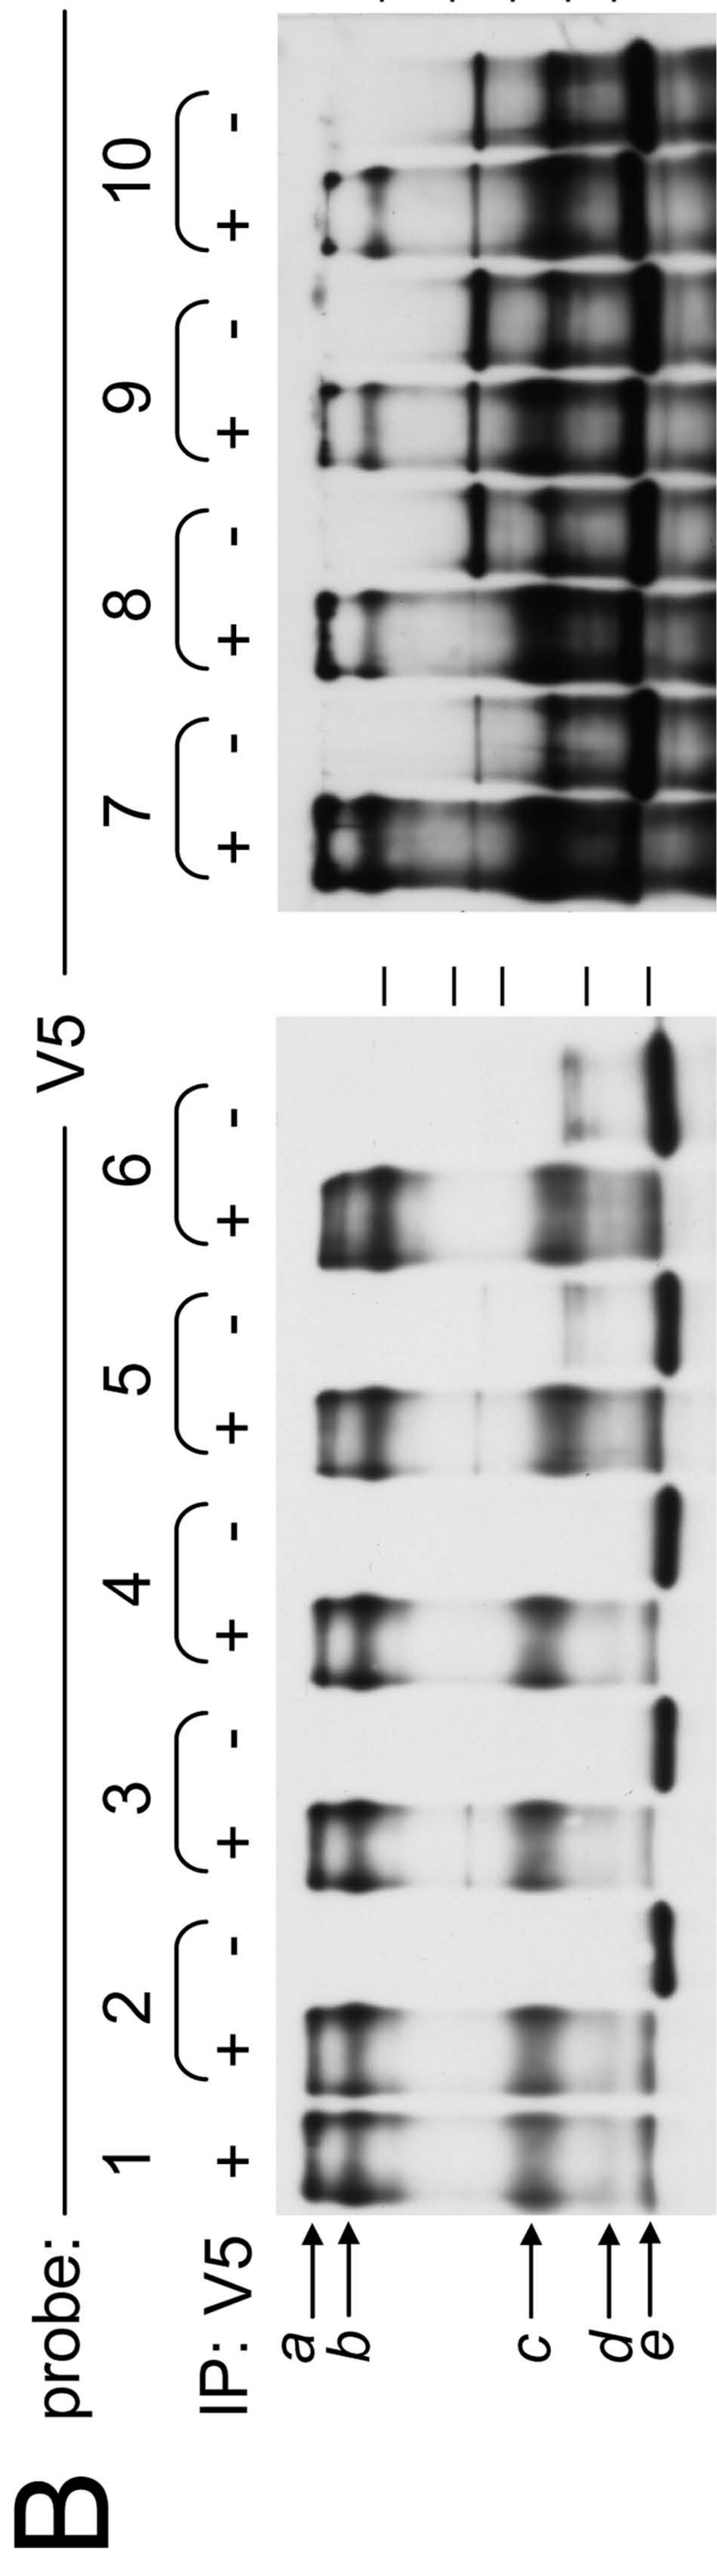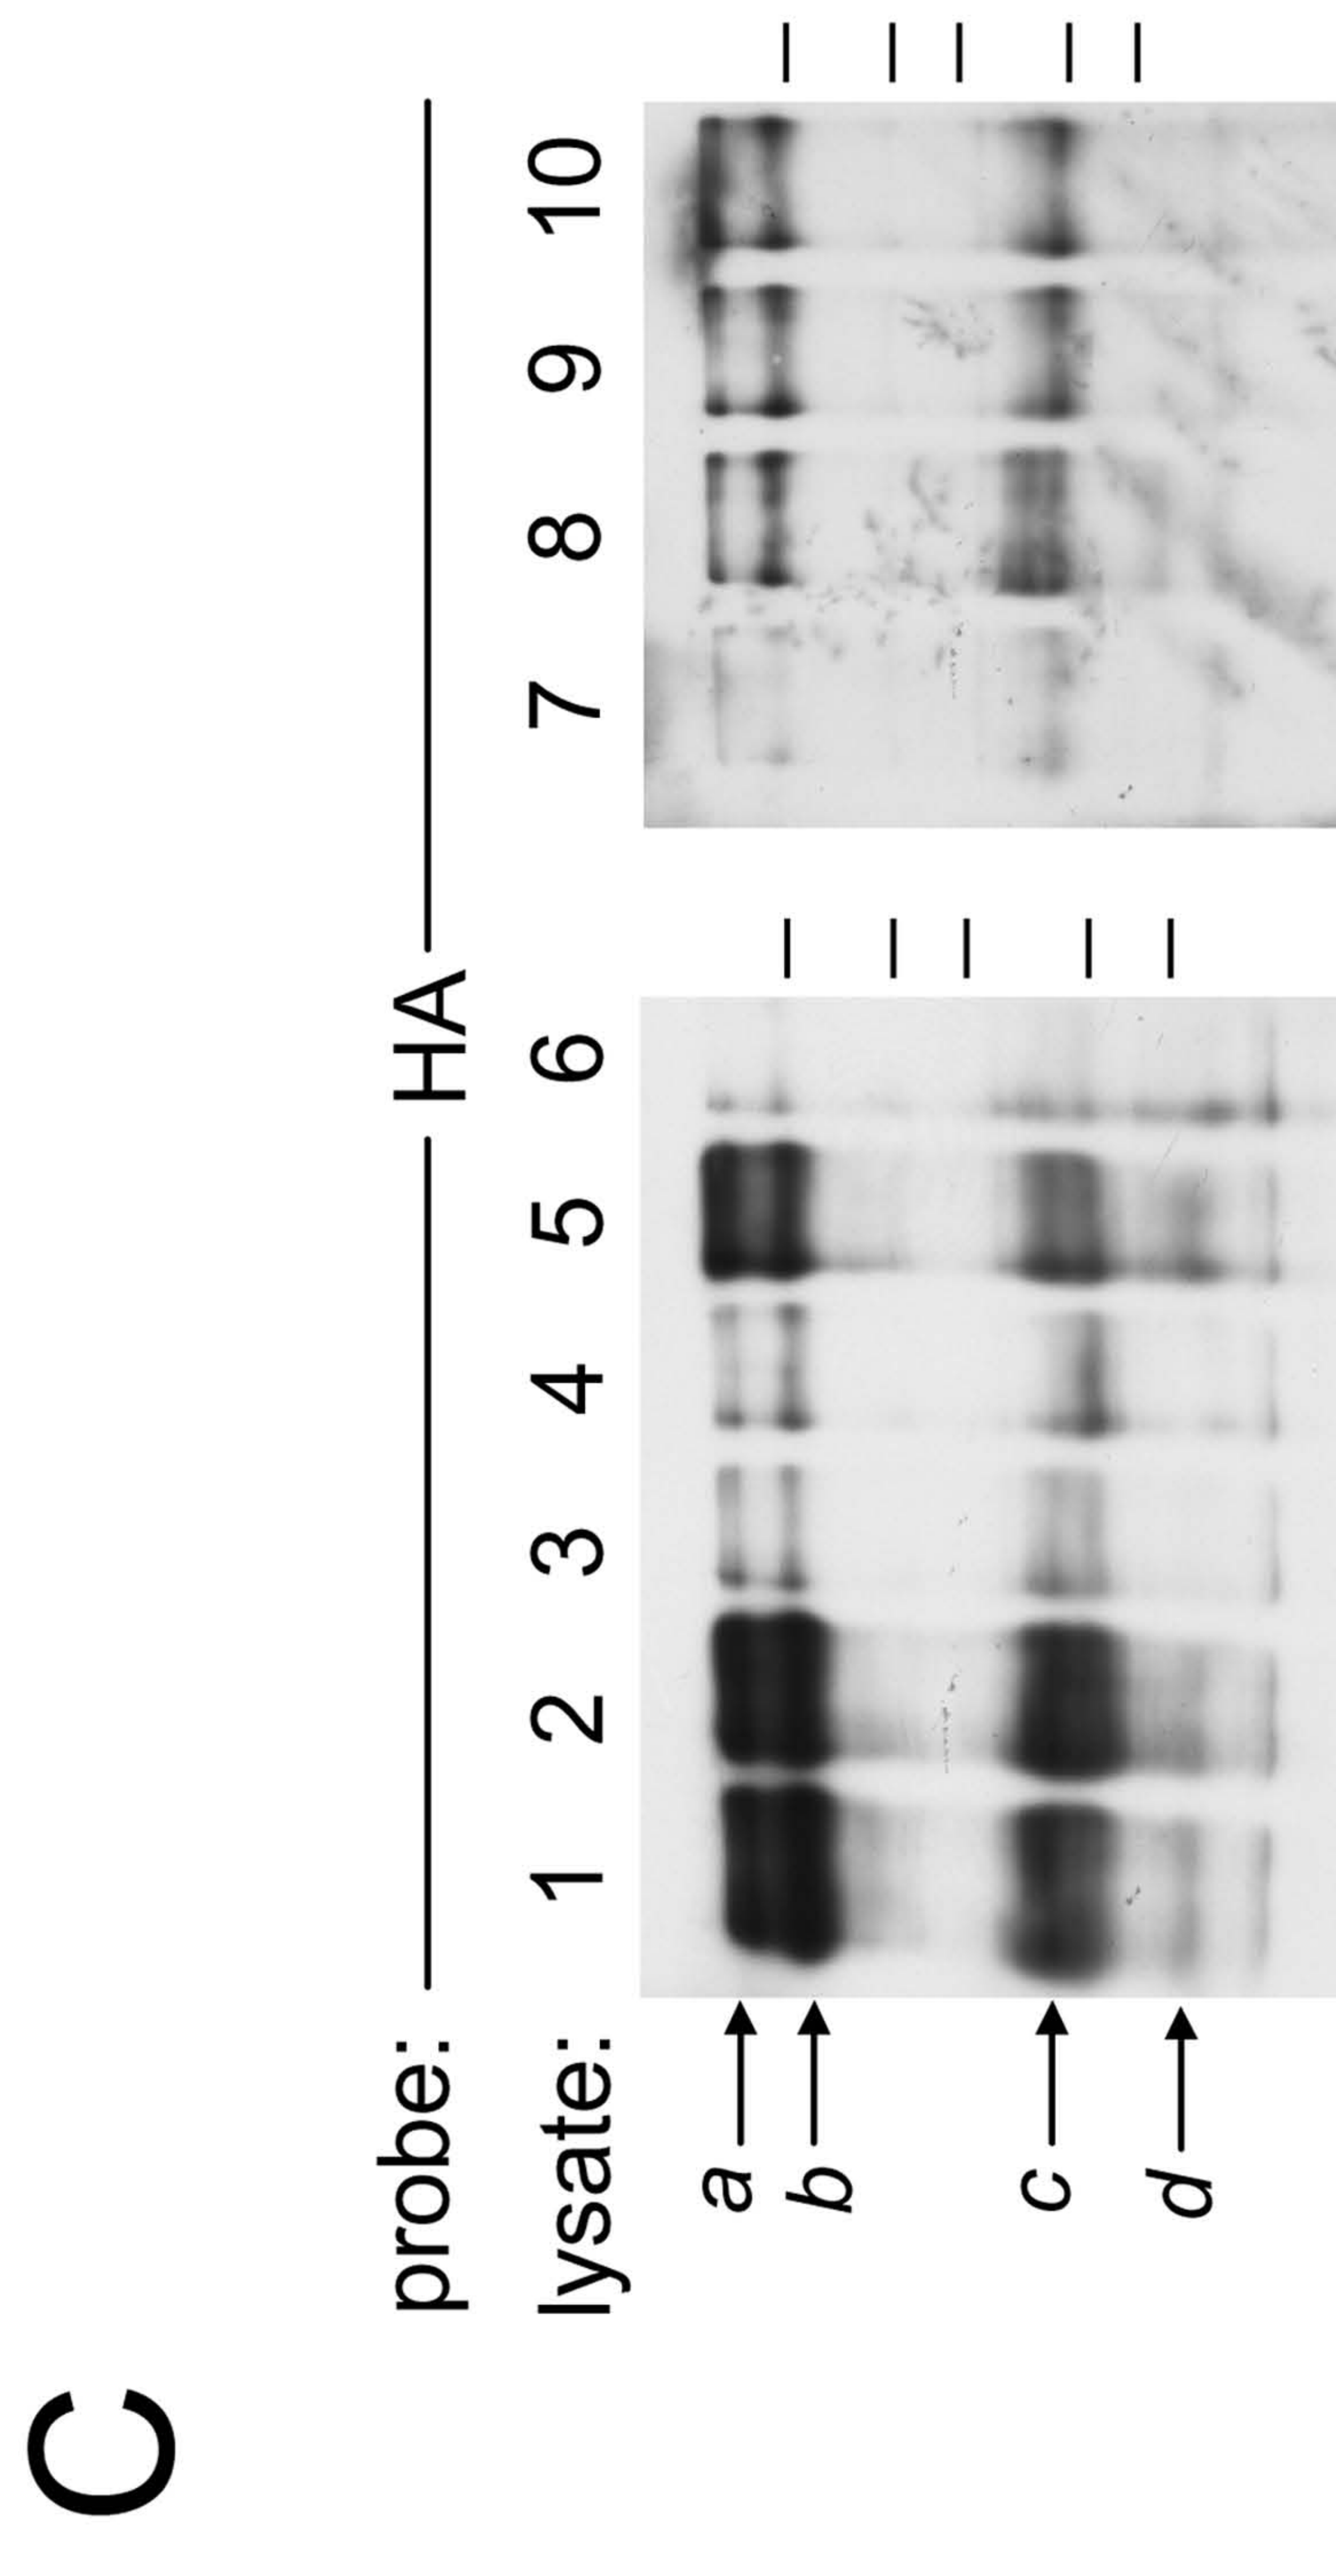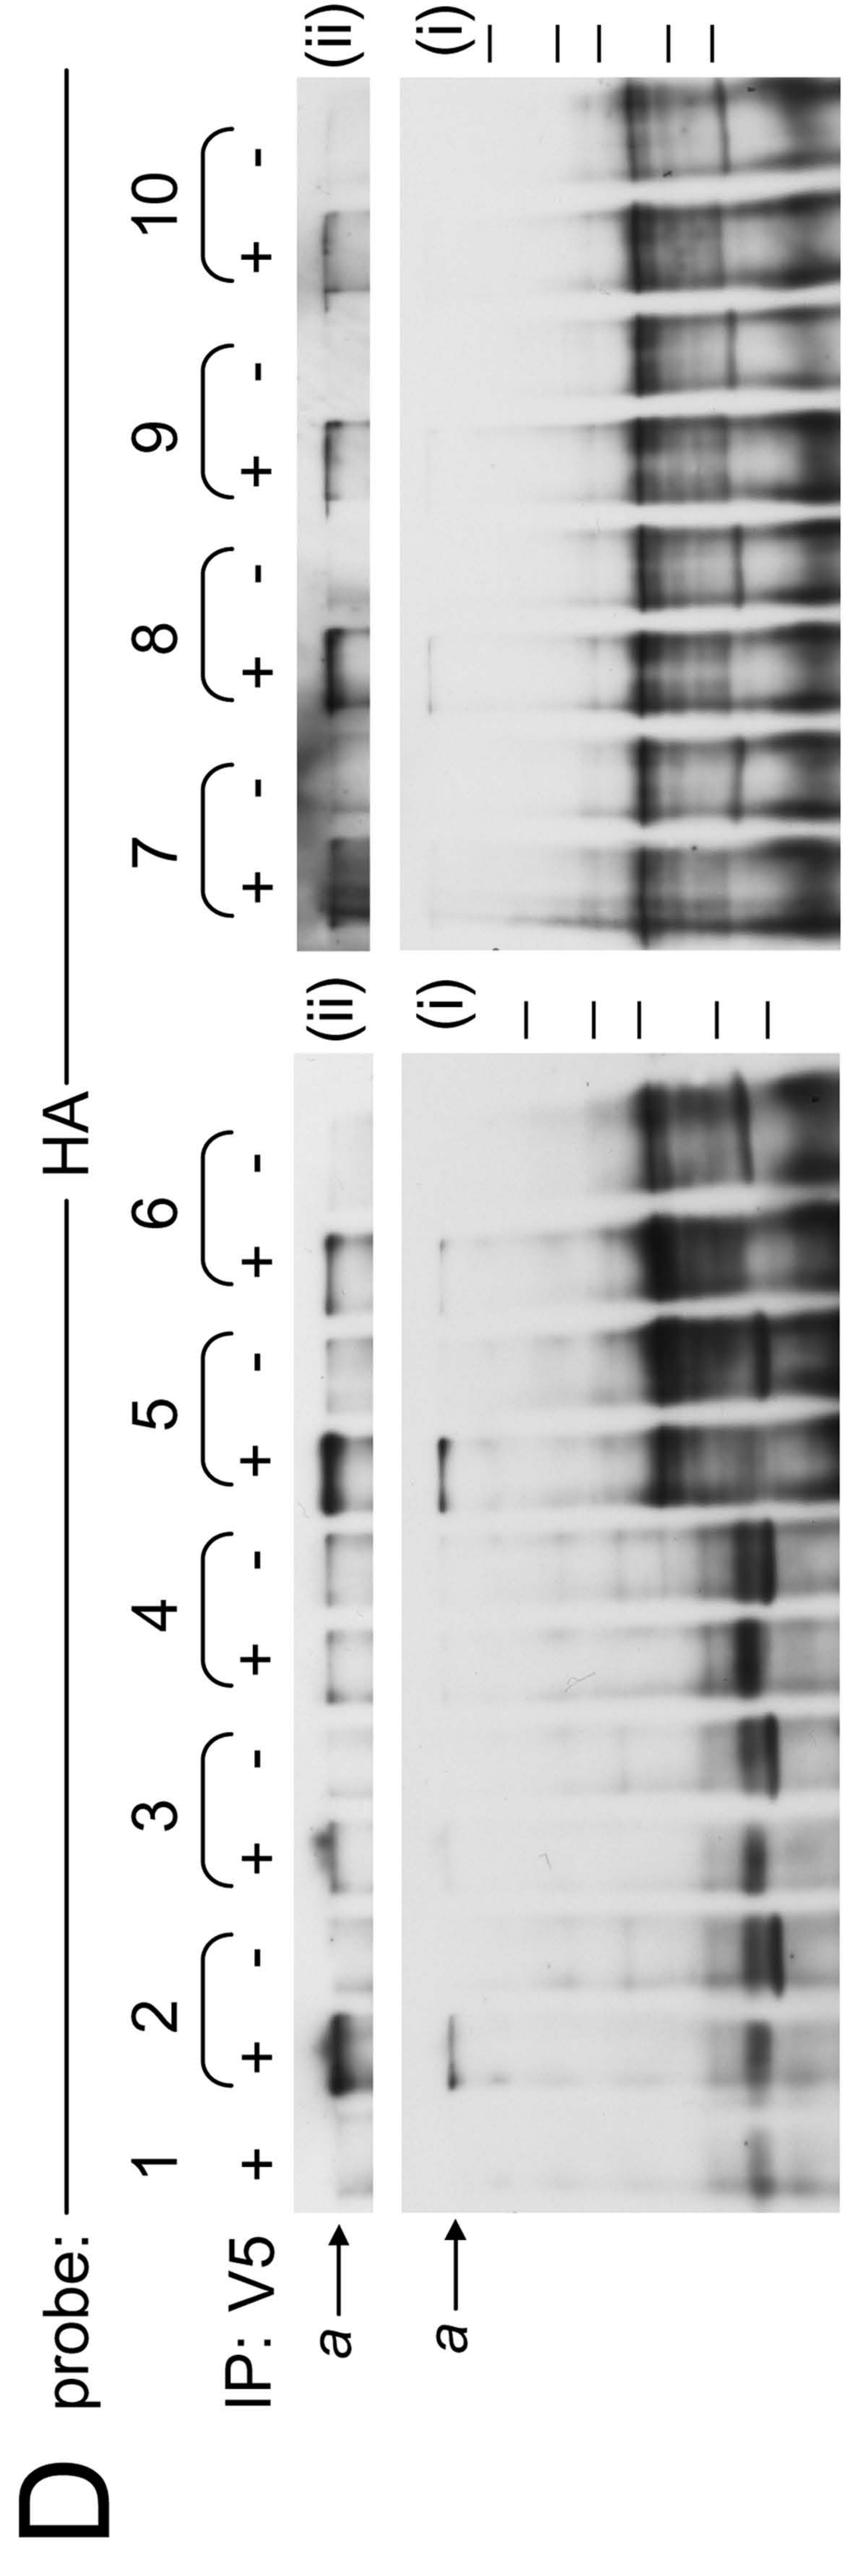

Supplement: MOL52829_SuppFig2.pdf [file MOL52829_SuppFig2.pdf]
